# Supplementary material
Source: PubMed Central journal article supplement (PMC5196898)
Supplement: thnov07p0213s1.pdf [file thnov07p0213s1.pdf]

## Supplementary materials

### Genome-wide lncRNA microarray profiling identified novel circulating lncRNAs for detection of gastric cancer

Kecheng Zhang<sup>1\*</sup>, Hongzhi Shi<sup>2\*</sup>, Hongqing Xi<sup>1\*</sup>, Xiaosong Wu<sup>1</sup>, Jianxin Cui<sup>1</sup>, Yunhe Gao<sup>1</sup>, Wenquan Liang<sup>1</sup>, Chong Hu<sup>1</sup>, Yi Liu<sup>1</sup>,  
Jiyang Li<sup>1</sup>, Ning Wang<sup>1</sup>, Bo Wei<sup>1</sup>, Lin Chen<sup>1</sup>

<sup>1</sup> Department of General Surgery & Institute of General Surgery, Chinese People's Liberation Army General Hospital, Fuxing Road 28, 100853 Beijing, P.R. China

<sup>2</sup> Department of General Surgery, General Hospital of Armed Police Force, Yongding Road 69, 100039 Beijing, P.R. China

\*Contributed equally to this work

**Figure S1.** Association of blood cells (including white blood cells (WBCs), red blood cells (RBCs), platelets (PLTs) and hemoglobin (Hb)) with lncRNAs *TINCR* (A), *CCAT2* (B), *AOC4P* (C), *BANCR* (D) and *LINC00857* (E), respectively.

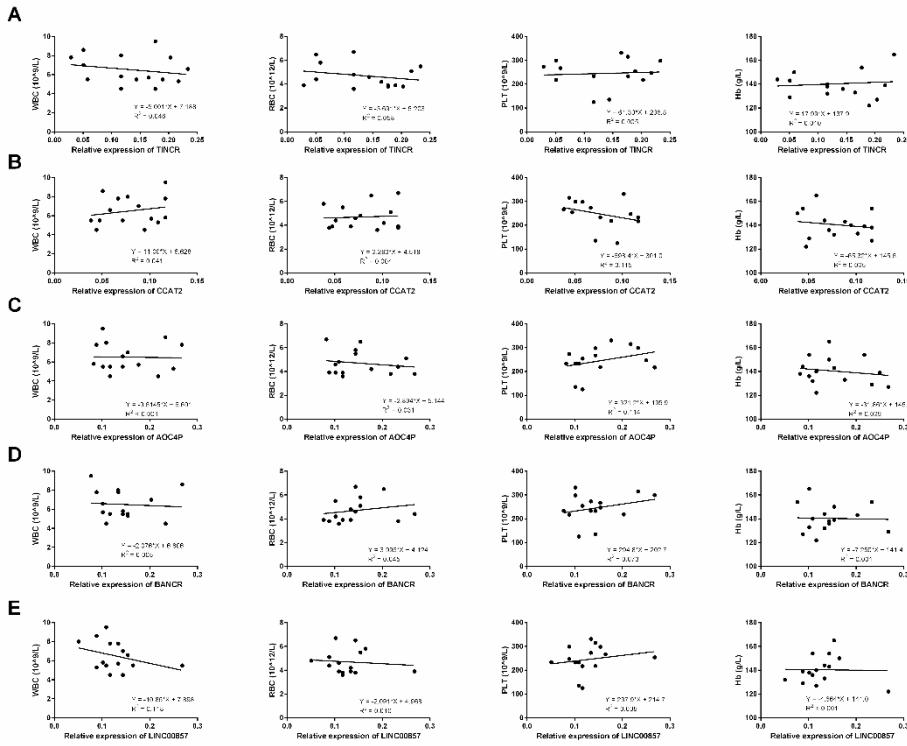

**Figure S2.** Box and whisker and ROC plots for individual lncRNAs *TINCR* (A), *CCAT2* (B), *AOC4P* (C), *BANCR* (D) and *LINC00857* (E) in the training phase. The horizontal line in the middle of each box indicates the median, whereas the top and bottom borders of the box mark the 95th and 5th percentiles, respectively. The whiskers above and below the box extend to the most extreme expression point no longer than 1.5 times the interquartile range from the box. The Mann-Whitney U test was used.

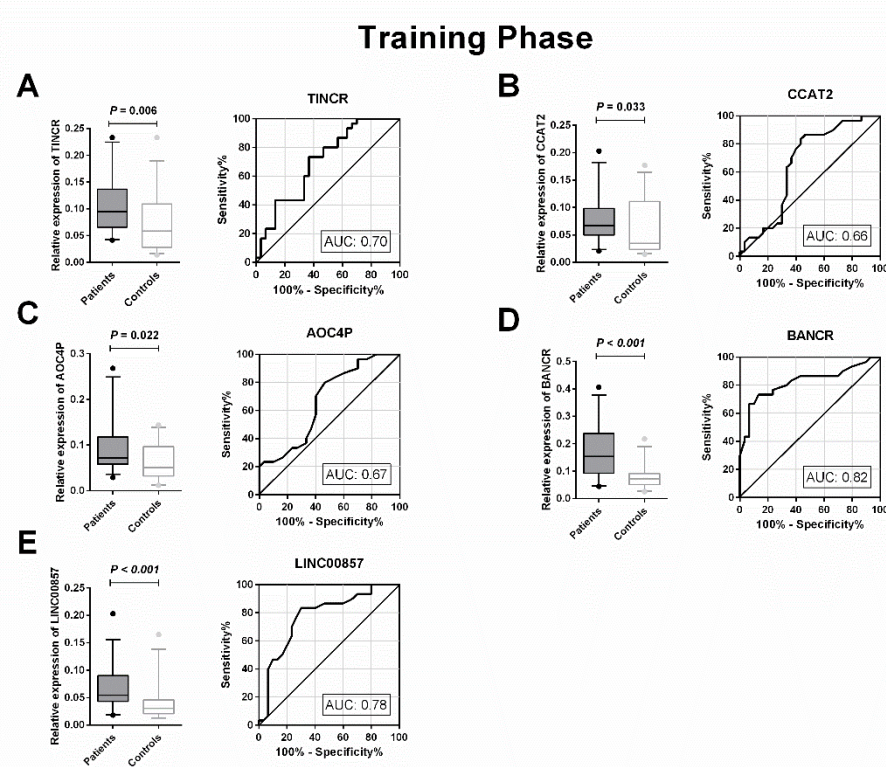

**Figure S3.** ROC plot for the diagnostic performance of CEA (A), CA125 (B), CA19-9 (C) and CA72-4 (D) in the training phase.

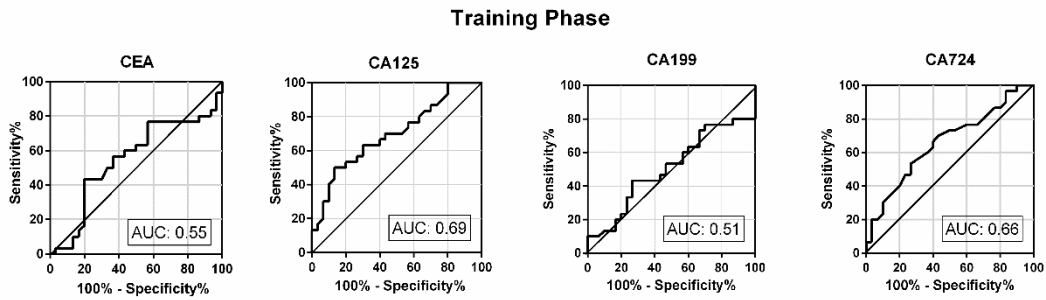

**Figure S4.** Box and whisker and ROC plots for individual lncRNAs *TINCR* (A), *CCAT2* (B), *AOC4P* (C), *BANCR* (D) and *LINC00857* (E) in the validation phase. The horizontal line in the middle of each box indicates the median, whereas the top and bottom borders of the box mark the 95th and 5th percentiles, respectively. The whiskers above and below the box extend to the most extreme point no longer than 1.5 times the interquartile range from the box. The Mann-Whitney U test was used.

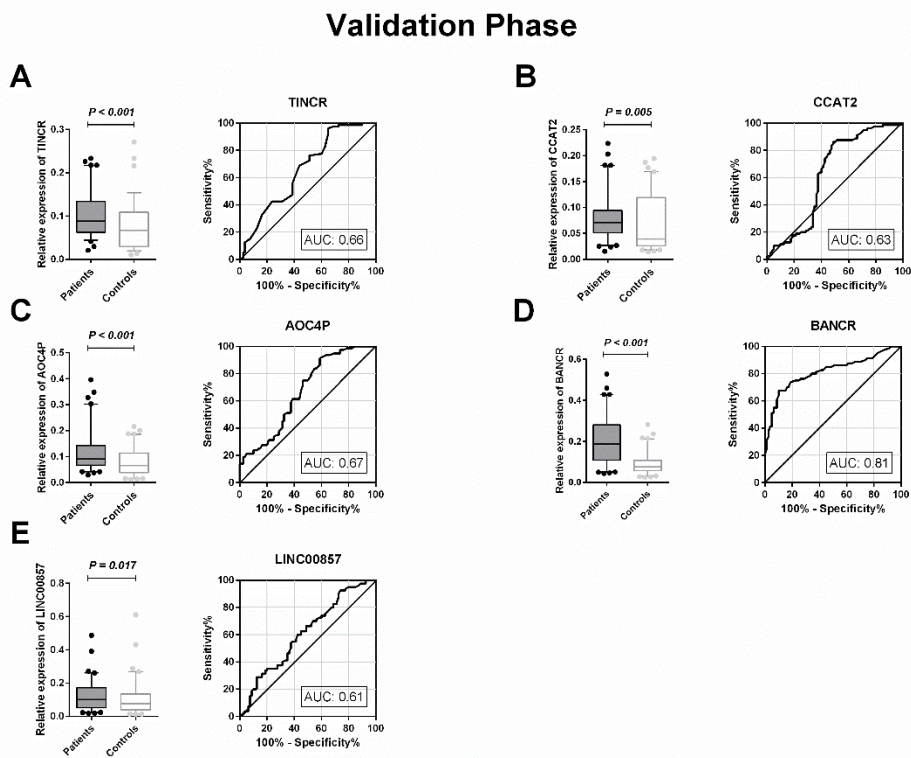

**Figure S5.** ROC plot for the diagnostic performance of CEA (A), CA125 (B), CA19-9 (C) and CA72-4 (D) in the validation phase.

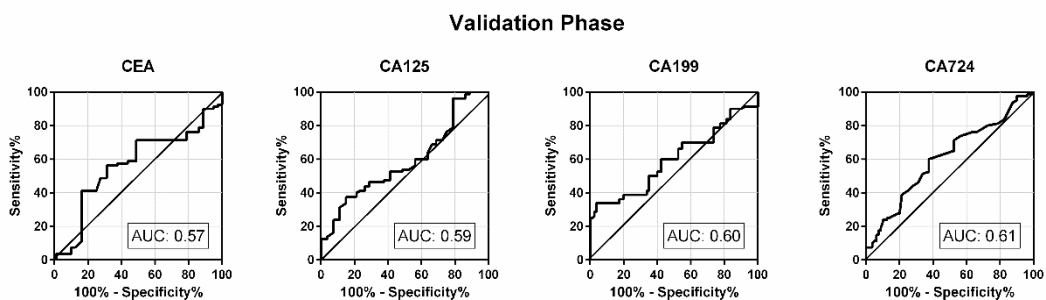

Table S1. qRT-PCR primers

| Genes           | Forward                         | Reverse                          |
|-----------------|---------------------------------|----------------------------------|
| HOTAIR          | 5'-GGTAGAAAAAGCAACCACGAAGC-3'   | 5'-ACATAAACCTCTGTCTGTGAGTGCC-3'  |
| ANRIL           | 5'-TTGTGAAGCCCAAGTACTGC-3'      | 5'-TTCCTGTGGAGACGTTGGT-3'        |
| HOXA-AS2        | 5'-CCCGTAGGAAGAACCGATGA-3'      | 5'-TTTAGGCCCTTCGCAGACAGC-3'      |
| ENST00000601909 | 5'-CTGTGGAAGTGCTCATCATAGT-3'    | 5'-CAGCTGTACCACCTACCTTTAC-3'     |
| TINCR           | 5'-TGTGGCCCAAACCTCAGGGATACAT-3' | 5'-AGATGACAGTGGCTGGAGTTGTCA-3'   |
| ENST00000509463 | 5'-CAGTTGGCTCCTGCTAATGT-3'      | 5'-CTCTGGTGGGAAGCCCTATTC-3'      |
| SPRY4-IT1       | 5'-GCTGAGCTGGTGGTTGAAAGGAATC-3' | 5'-GCTTGGCCACGATGACTTGG-3'       |
| CCAT2           | 5'-CCCTGGTCAAATTGCTTAACCT-3'    | 5'-TTATTGTCCTCCTGTGTTTTATGGAT-3' |
| MIR4435-2HG     | 5'-CCTGCTCTGCTCCTCTAAATAC-3'    | 5'-CCGAGGTGGTGATGTTTGA-3'        |
| AOC4P           | 5'-AAAGGAGGTGAGAGGGAATGT-3'     | 5'-GCTGGGCACTGGGAGATAC-3'        |
| HOXA10-AS       | 5'-AGGAAGGGAAGACAGGGAAA-3'      | 5'-CCAGAACTGGTCGGTGATTTAG-3'     |
| PVT1            | 5'-TCAAGATGGCTGTGCCTGTC-3'      | 5'-TTCCACCAGCGTTATCCCC-3'        |
| BANCR           | 5'-AGCTTGATCACCATCTCCATATCA-3'  | 5'-ACCATAAAAATTATCTGGTCCCTGT-3'  |
| LINC00857       | 5'-CCCCTGCTTCATTGTTTCCC-3'      | 5'-AGCTTGCCTTCTGGGTACT-3'        |
| LINC00974       | 5'-TCTAACGTGCCTGGGACCTA-3'      | 5'-AAATGCCTACCGCCAGTTCA-3'       |
| HULC            | 5'-ATCTGCAAGCCAGGAAGAGTC-3'     | 5'-CTTGCTTGATGCTTTGGTCTGT-3'     |
| MALAT1          | 5'-AACGCAGACGAAAATGGAAAGA-3'    | 5'-CCTTCTAACTTCTGCACCACCAGA-3'   |
| GAPDH           | 5'-CATGTTCTGTCATGGGTGTGAACCA-3' | 5'-AGTGATGGCATGGACTGTGGTCAT-3'   |
| β-actin         | 5'-TCCTCTCCCAAGTCCACACA-3'      | 5'-GCACGAAGGCTCATCATTCA-3'       |

Table S2. Differentially expressed lncRNAs ( $P < 0.05$ ; fold change  $> 2$ ) collectively selected from two sets of microarray profiling

| Dysregulation | Seqname         | Gene Symbol   | Source    | Chrom | Synonyms                                                  |
|---------------|-----------------|---------------|-----------|-------|-----------------------------------------------------------|
| up            | NR_003716       | HOTAIR        | RefSeq_NR | Chr12 | HOXAS; HOXC-AS4; HOXC11-AS1; NCRNA00072                   |
| up            | NR_003529       | CDKN2B-AS     | RefSeq_NR | Chr9  | ANRIL; p15AS; PCAT12; CDKN2BAS;<br>CDKN2B-AS1; NCRNA00089 |
| up            | NR_122069       | HOXA-AS2      | RefSeq_NR | Chr7  | HOXA3as                                                   |
| up            | ENST00000601909 | RP11-98D18.17 | Ensembl   | Chr1  | -                                                         |
| up            | NR_027064       | TINCR         | RefSeq_NR | Chr19 | PLAC2; LINC00036; NCRNA00036;<br>onco-lncRNA-16           |
| up            | ENST00000509463 | RP11-597D13.9 | Ensembl   | Chr4  | -                                                         |
| up            | NR_002196       | H19           | RefSeq_NR | Chr11 | ASM; BWS; WT2; ASM1; D11S813E; LINC00008;<br>NCRNA00008   |
| up            | NR_131221       | SPRY4-IT1     | RefSeq_NR | Chr5  | SPRIGHTLY                                                 |
| up            | NR_109834       | CCAT2         | RefSeq_NR | Chr8  | NCCP1; LINC00873                                          |
| up            | ENST00000432818 | MIR4435-2HG   | Ensembl   | Chr2  | AGD2; MIR4435-1HG; LINC00978; AK001796                    |
| up            | NR_002773       | AOC4P         | RefSeq_NR | Chr17 | AOC4; UPAT                                                |
| up            | NR_046609       | HOXA10-AS     | RefSeq_NR | Chr7  | HOXA-AS4                                                  |
| up            | NR_003367       | PVT1          | RefSeq_NR | Chr8  | LINC00079; NCRNA00079; onco-lncRNA-100                    |
| up            | NR_047671       | BANCR         | RefSeq_NR | Chr9  | LINC00586                                                 |
| up            | NR_038464       | LINC00857     | RefSeq_NR | Chr10 | -                                                         |
| up            | NR_024204       | LINC00152     | RefSeq_NR | Chr2  | C2orf59; NCRNA00152                                       |
| up            | NR_038442       | LINC00974     | RefSeq_NR | Chr17 | -                                                         |
| up            | NR_004855       | HULC          | RefSeq_NR | Chr6  | HCCAT1; LINC00078; NCRNA00078                             |

|      |                 |                |           |       |                                                                  |
|------|-----------------|----------------|-----------|-------|------------------------------------------------------------------|
| up   | NR_002819       | MALAT1         | RefSeq_NR | Chr11 | HCN; NEAT2; PRO2853; mascRNA; LINC00047;<br>NCRNA00047           |
| up   | NR_015379       | UCA1           | RefSeq_NR | Chr19 | CUDR; UCAT1; LINC00178; NCRNA00178;<br>onco-lncRNA-36            |
| down | NR_103844       | NPTN-IT1       | RefSeq_NR | Chr15 | lncRNA-LET                                                       |
| down | ENST00000579431 | GATA6-AS1      | Ensembl   | Chr18 | locus5689                                                        |
| down | ENST00000609924 | RP13-270P17.3  | Ensembl   | Chr18 | -                                                                |
| down | NR_038263       | SOCS2-AS1      | RefSeq_NR | Chr12 | -                                                                |
| down | NR_038170       | ABHD16A        | RefSeq_NR | Chr6  | BAT5; NG26; PP199; D6S82E                                        |
| down | NR_034105       | CRNDE          | RefSeq_NR | Chr16 | CRNDEP; PNAS-108; lincIRX5; LINC00180;<br>NCRNA00180             |
| down | ENST00000565145 | RP11-554A11.9  | Ensembl   | Chr11 | -                                                                |
| down | ENST00000440403 | AP000320.6     | Ensembl   | Chr21 | -                                                                |
| down | NR_002766       | MEG3           | RefSeq_NR | Chr14 | GTL2; FP504; prebp1; PRO0518; PRO2160;<br>LINC00023; NCRNA00023; |
| down | NR_015440       | LINC00982      | RefSeq_NR | Chr1  | -                                                                |
| down | ENST00000590318 | RP11-845C23.3  | Ensembl   | Chr18 | -                                                                |
| down | NR_002578       | GAS5           | RefSeq_NR | Chr1  | SNHG2; NCRNA00030                                                |
| down | ENST00000609497 | RP5-1159O4.1   | Ensembl   | Chr7  | -                                                                |
| down | ENST00000447911 | SNHG14         | Ensembl   | Chr15 | 115HG; LNCAT; UBE3AATS; UBE3A-AS1;<br>NCRNA00214; UBE3A-AS;      |
| down | ENST00000540066 | TOPORS-AS1     | Ensembl   | Chr9  | -                                                                |
| down | NR_038883       | LINC00649      | RefSeq_NR | Chr21 | -                                                                |
| down | NR_038285       | MF12-AS1       | RefSeq_NR | Chr3  | -                                                                |
| down | ENST00000587499 | JRK            | Ensembl   | Chr8  | JH8, jerky                                                       |
| down | NR_103734       | LINC00342      | RefSeq_NR | Chr2  | NCRNA00342                                                       |
| down | NR_026761       | LINC00467      | RefSeq_NR | Chr1  | C1orf97                                                          |
| down | NR_038239       | LINC00658      | RefSeq_NR | Chr20 | -                                                                |
| down | NR_033957       | LINC00842      | RefSeq_NR | Chr10 | -                                                                |
| down | ENST00000427857 | FAM41C         | Ensembl   | Chr1  | -                                                                |
| down | NR_002323       | TUG1           | RefSeq_NR | Chr22 | TI-227H; LINC00080; NCRNA00080                                   |
| down | NR_033925       | FENDRR         | RefSeq_NR | Chr16 | FOX1-AS1; lincFOX1; TCONS_00024240;<br>onco-lncRNA-21            |
| down | ENST00000562471 | RP11-7K24.3    | Ensembl   | Chr6  | -                                                                |
| down | NR_119376       | FER1L4         | RefSeq_NR | Chr20 | C20orf124                                                        |
| down | ENST00000553909 | RP11-903H12.5  | Ensembl   | Chr14 | -                                                                |
| down | NR_126369       | GACAT1         | RefSeq_NR | Chr2  | LINC00876                                                        |
| down | NR_004387       | SCARNA10       | RefSeq_NR | Chr12 | U85                                                              |
| down | NR_130107       | GHET1          | RefSeq_NR | Chr7  | lncRNA-GHET1                                                     |
| down | NR_130915       | LCAL1          | RefSeq_NR | Chr6  | onco-lncRNA-27                                                   |
| down | NR_027790       | MIR99AHG       | RefSeq_NR | Chr21 | MONC; C21orf34; C21orf35; FLJ38295;<br>LINC00478                 |
| down | ENST00000527061 | RP11-867G23.10 | Ensembl   | Chr11 | -                                                                |
| down | ENST00000514752 | SLC7A11-AS1    | Ensembl   | Chr11 | -                                                                |
| down | NR_034108       | TRAF3IP2-AS1   | RefSeq_NR | Chr6  | C6UAS; C6orf3; NCRNA00248; TRAF3IP2-AS2                          |
| down | ENST00000497872 | AL928768.3     | Ensembl   | Chr14 | -                                                                |
| down | ENST00000538616 | CD27-AS1       | Ensembl   | Chr2  | -                                                                |

Table S3. Diagnostic performance of individual biomarkers in the training phase

|           | Cutoff                | Sensitivity<br>(95% CI) | Specificity<br>(95% CI) | AUC (95%<br>CI)     | True<br>positive | True<br>negative | False<br>positive | False<br>negative |
|-----------|-----------------------|-------------------------|-------------------------|---------------------|------------------|------------------|-------------------|-------------------|
| TINCR     | $7.2 \times 10^{-2}$  | 0.73<br>(0.54-0.88)     | 0.63<br>(0.44-0.80)     | 0.70<br>(0.57-0.84) | 22               | 19               | 11                | 8                 |
| CCAT2     | $4.1 \times 10^{-2}$  | 0.83<br>(0.65-0.94)     | 0.57<br>(0.37-0.75)     | 0.66<br>(0.52-0.80) | 25               | 17               | 13                | 5                 |
| AOC4P     | $5.5 \times 10^{-2}$  | 0.80<br>(0.61-0.92)     | 0.53<br>(0.34-0.72)     | 0.67<br>(0.53-0.81) | 24               | 16               | 14                | 6                 |
| BANCR     | $11.0 \times 10^{-2}$ | 0.73<br>(0.54-0.88)     | 0.87<br>(0.69-0.96)     | 0.82<br>(0.71-0.93) | 22               | 26               | 4                 | 8                 |
| LINC00857 | $4.0 \times 10^{-2}$  | 0.83<br>(0.65-0.94)     | 0.70<br>(0.51-0.85)     | 0.78<br>(0.65-0.90) | 25               | 21               | 9                 | 5                 |
| CEA       | 5 µg/L                | 0.13<br>(0.04-0.31)     | 0.97<br>(0.83-100)      | 0.55<br>(0.40-0.70) | 4                | 29               | 1                 | 26                |
| CA125     | 35 U/ml               | 0.30<br>(0.15-0.49)     | 0.93<br>(0.78-0.99)     | 0.69<br>(0.56-0.83) | 9                | 28               | 2                 | 21                |
| CA19-9    | 37 U/ml               | 0.17<br>(0.06-0.35)     | 1.00<br>(0.48-1.00)     | 0.51<br>(0.36-0.66) | 5                | 30               | 0                 | 25                |
| CA72-4    | 10 U/ml               | 0.10<br>(0.02-0.27)     | 0.97<br>(0.83-1.00)     | 0.66<br>(0.52-0.80) | 3                | 29               | 1                 | 27                |

Table S4. Diagnostic performance of individual biomarkers in the validation phase

|           | Cutoff <sup>§</sup>   | Sensitivity<br>(95% CI) | Specificity<br>(95% CI) | AUC (95%<br>CI)     | True<br>positive | True<br>negative | False<br>positive | False<br>negative |
|-----------|-----------------------|-------------------------|-------------------------|---------------------|------------------|------------------|-------------------|-------------------|
| TINCR     | $7.2 \times 10^{-2}$  | 0.69<br>(0.57-0.79)     | 0.56<br>(0.45-0.67)     | 0.66<br>(0.57-0.74) | 55               | 45               | 35                | 25                |
| CCAT2     | $4.1 \times 10^{-2}$  | 0.85<br>(0.75-0.92)     | 0.51<br>(0.40-0.63)     | 0.63<br>(0.54-0.72) | 68               | 41               | 39                | 12                |
| AOC4P     | $5.5 \times 10^{-2}$  | 0.86<br>(0.77-0.93)     | 0.41<br>(0.30-0.53)     | 0.67<br>(0.59-0.75) | 69               | 33               | 47                | 11                |
| BANCR     | $11.0 \times 10^{-2}$ | 0.75<br>(0.64-0.84)     | 0.78<br>(0.67-0.86)     | 0.81<br>(0.75-0.88) | 60               | 62               | 18                | 20                |
| LINC00857 | $4.0 \times 10^{-2}$  | 0.93<br>(0.84-0.97)     | 0.26<br>(0.17-0.37)     | 0.61<br>(0.52-0.70) | 74               | 21               | 59                | 6                 |
| CEA       | 5 µg/L                | 0.15<br>(0.08-0.25)     | 0.89<br>(0.80-0.95)     | 0.57<br>(0.48-0.66) | 12               | 71               | 9                 | 68                |
| CA125     | 35 U/ml               | 0.24<br>(0.15-0.35)     | 0.93<br>(0.84-0.97)     | 0.59<br>(0.50-0.68) | 19               | 74               | 6                 | 61                |
| CA199     | 37 U/ml               | 0.29<br>(0.19-0.40)     | 0.96<br>(0.89-1.00)     | 0.60<br>(0.51-0.69) | 23               | 77               | 3                 | 57                |
| CA724     | 10 U/ml               | 0.11<br>(0.05-0.20)     | 0.94<br>(0.86-0.98)     | 0.61<br>(0.52-0.70) | 9                | 75               | 5                 | 71                |

<sup>§</sup> Cut-off values identified in the training phase are used
